# Supplementary material for: Sirtuin 1-Activating Compounds: Discovery of a Class of Thiazole-Based Derivatives
Source: MDPI journal article supplement (doi:10.3390/molecules27196535), 2022-10-03
Supplement: s1 [file s1]

# Supporting Information

## Sirtuin 1-activating compounds: discovery of a class of thiazole-based derivatives

Giulia Bononi, Valentina Citi, Margherita Lapillo, Alma Martelli, Giulio Poli, Tiziano Tuccinardi, Carlotta Granchi, Lara Testai, Vincenzo Calderone, Filippo Minutolo

### Table of Contents

|                                                                                                 |         |
|-------------------------------------------------------------------------------------------------|---------|
| <b>Figure S1-S4.</b> RP-HPLC traces of the final compounds.                                     | S2-S5   |
| <b>Figure S5-S12.</b> $^1\text{H}$ and $^{13}\text{C}$ NMR spectra of the final compounds.      | S6-S13  |
| <b>Figure S13.</b> Superimposed SIRT1/p53-AMC/ <b>8</b> and SIRT1/p53-AMC/resveratrol complexes | S14     |
| <b>Figure S14-S17.</b> ESI-HRMS spectra of the final compounds.                                 | S15-S16 |

# ==== Shimadzu LabSolutions Analysis Report =====

Sample Name : ML13\_500uM  
 Sample ID : ML13\_500uM  
 Data Filename : ML13\_500uM\_new\_p.lcd  
 Method Filename : MAGL254 MeOH.lcm

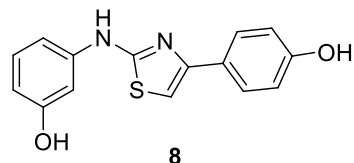

mAU

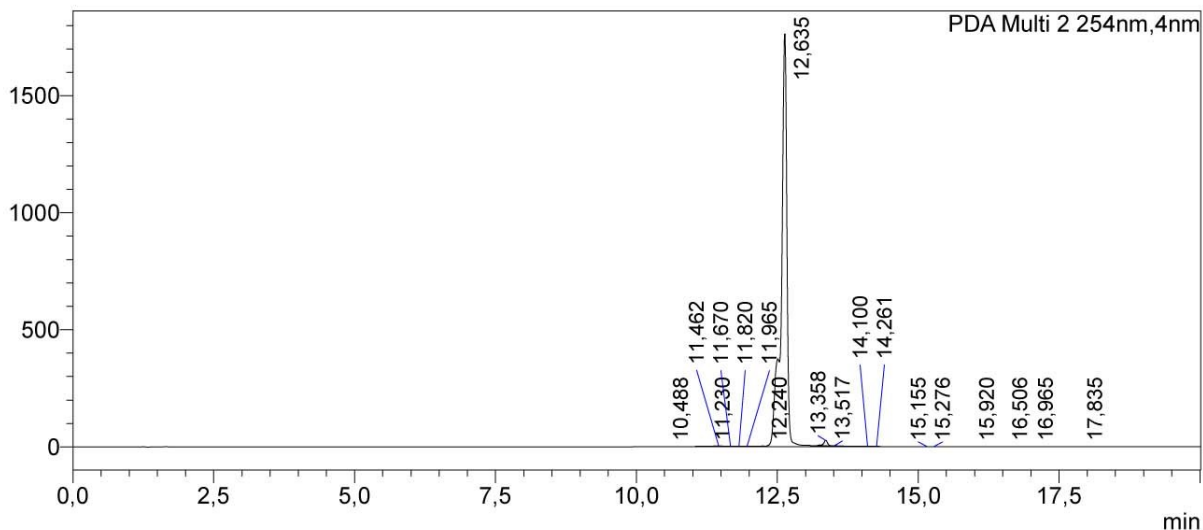

PDA Ch2 254nm

| Peak# | Ret. Time | Area     | Area%   | Height  |
|-------|-----------|----------|---------|---------|
| 1     | 10,488    | 1987     | 0,015   | 196     |
| 2     | 11,230    | 27128    | 0,208   | 1682    |
| 3     | 11,462    | 37186    | 0,285   | 2853    |
| 4     | 11,670    | 10098    | 0,077   | 1332    |
| 5     | 11,820    | 10725    | 0,082   | 1446    |
| 6     | 11,965    | 8543     | 0,065   | 1106    |
| 7     | 12,240    | 21470    | 0,165   | 2233    |
| 8     | 12,635    | 12776722 | 97,934  | 1761991 |
| 9     | 13,358    | 124767   | 0,956   | 23637   |
| 10    | 13,517    | 15096    | 0,116   | 1891    |
| 11    | 14,100    | 1604     | 0,012   | 215     |
| 12    | 14,261    | 1066     | 0,008   | 199     |
| 13    | 15,155    | 2167     | 0,017   | 381     |
| 14    | 15,276    | 1791     | 0,014   | 244     |
| 15    | 15,920    | 1106     | 0,008   | 160     |
| 16    | 16,506    | 1519     | 0,012   | 165     |
| 17    | 16,965    | 1011     | 0,008   | 135     |
| 18    | 17,835    | 2283     | 0,017   | 225     |
| Total |           | 13046268 | 100,000 | 1800092 |

**Figure S1.** HPLC chromatogram of compound **8**.

# ==== Shimadzu LabSolutions Analysis Report ====

Sample Name : ML19\_500uM  
Sample ID : ML19\_500uM  
Data Filename : ML19\_500uM\_p.lcd  
Method Filename : MAGL254 MeOH.lcm

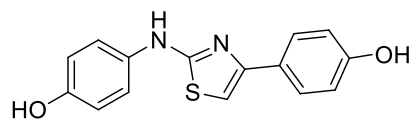

9

nAU

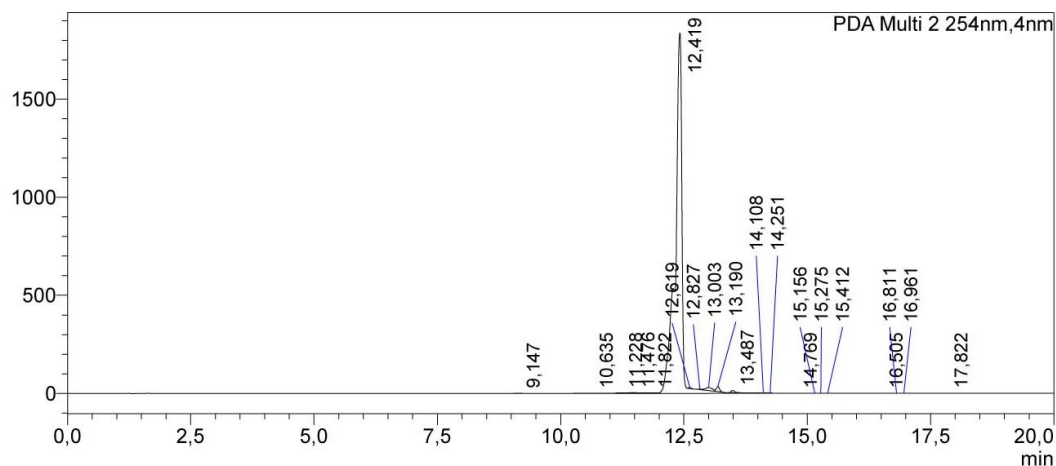

PDA Ch2 254nm

| Peak# | Ret. Time | Area     | Area%  | Height  |
|-------|-----------|----------|--------|---------|
| 1     | 9,147     | 13155    | 0,073  | 1024    |
| 2     | 10,635    | 14171    | 0,079  | 588     |
| 3     | 11,228    | 46352    | 0,259  | 2183    |
| 4     | 11,476    | 68848    | 0,384  | 3541    |
| 5     | 11,822    | 14998    | 0,084  | 2036    |
| 6     | 12,419    | 17399929 | 97,042 | 1837386 |
| 7     | 12,619    | 16546    | 0,092  | 5294    |
| 8     | 12,827    | 17410    | 0,097  | 3074    |
| 9     | 13,003    | 154593   | 0,862  | 15585   |
| 10    | 13,190    | 110489   | 0,616  | 26022   |
| 11    | 13,487    | 57580    | 0,321  | 12196   |
| 12    | 14,108    | 1266     | 0,007  | 249     |
| 13    | 14,251    | 1416     | 0,008  | 229     |
| 14    | 14,769    | 1377     | 0,008  | 183     |
| 15    | 15,156    | 2365     | 0,013  | 363     |
| 16    | 15,275    | 1744     | 0,010  | 279     |
| 17    | 15,412    | 2017     | 0,011  | 266     |
| 18    | 16,505    | 1871     | 0,010  | 186     |
| 19    | 16,811    | 1092     | 0,006  | 117     |
| 20    | 16,961    | 1254     | 0,007  | 183     |

| Peak# | Ret. Time | Area     | Area%   | Height  |
|-------|-----------|----------|---------|---------|
| 21    | 17,822    | 1889     | 0,011   | 207     |
| Total |           | 17930361 | 100,000 | 1911189 |

Figure S2. HPLC chromatogram of compound 9.

# ==== Shimadzu LabSolutions Analysis Report =====

Sample Name : ML12\_500uM  
Sample ID : ML12\_500uM  
Data Filename : ML12\_500uM\_p.lcd  
Method Filename : MAGL254 MeOH.lcm

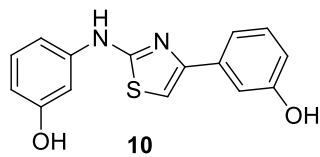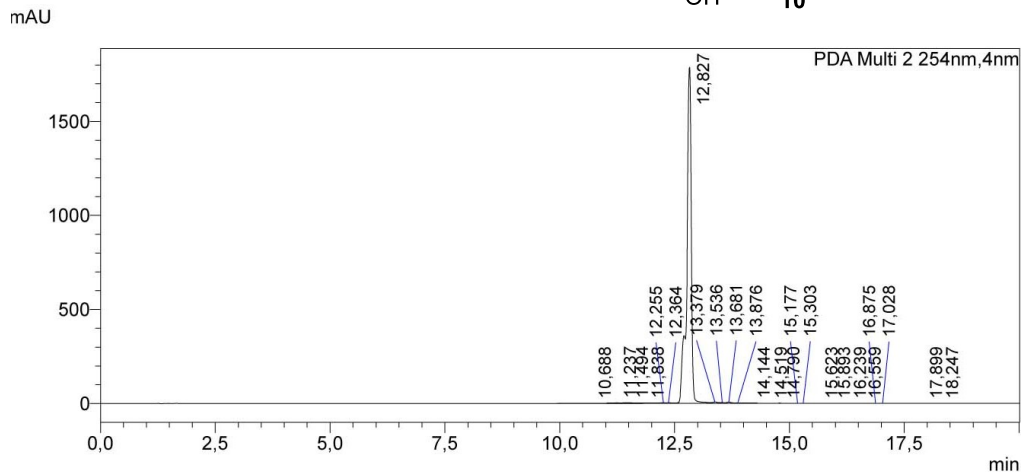

PDA Ch2 254nm

| Peak# | Ret. Time | Area     | Area%  | Height  |
|-------|-----------|----------|--------|---------|
| 1     | 10,688    | 36310    | 0,285  | 986     |
| 2     | 11,237    | 54828    | 0,431  | 2860    |
| 3     | 11,494    | 71957    | 0,566  | 3999    |
| 4     | 11,838    | 15904    | 0,125  | 2177    |
| 5     | 12,255    | 55607    | 0,437  | 3912    |
| 6     | 12,364    | 23705    | 0,186  | 3350    |
| 7     | 12,827    | 12181735 | 95,754 | 1786858 |
| 8     | 13,379    | 81858    | 0,643  | 7202    |
| 9     | 13,536    | 19705    | 0,155  | 4093    |
| 10    | 13,681    | 57558    | 0,452  | 6777    |
| 11    | 13,876    | 25795    | 0,203  | 2111    |
| 12    | 14,144    | 24085    | 0,189  | 1417    |
| 13    | 14,519    | 11058    | 0,087  | 906     |
| 14    | 14,790    | 14473    | 0,114  | 1025    |
| 15    | 15,177    | 7570     | 0,060  | 836     |
| 16    | 15,303    | 7919     | 0,062  | 732     |
| 17    | 15,623    | 6683     | 0,053  | 416     |
| 18    | 15,893    | 5971     | 0,047  | 330     |
| 19    | 16,239    | 4318     | 0,034  | 398     |
| 20    | 16,559    | 5752     | 0,045  | 449     |

| Peak# | Ret. Time | Area     | Area%   | Height  |
|-------|-----------|----------|---------|---------|
| 21    | 16,875    | 2905     | 0,023   | 298     |
| 22    | 17,028    | 2590     | 0,020   | 357     |
| 23    | 17,899    | 2423     | 0,019   | 241     |
| 24    | 18,247    | 1212     | 0,010   | 124     |
| Total |           | 12721924 | 100,000 | 1831854 |

Figure S3. HPLC chromatogram of compound **10**.

# ==== Shimadzu LabSolutions Analysis Report ====

Sample Name : ML20\_500uM  
 Sample ID : ML20\_500uM  
 Data Filename : ML20\_500uM\_p.lcd  
 Method Filename : MAGL254 MeOH.lcm

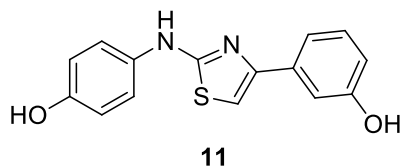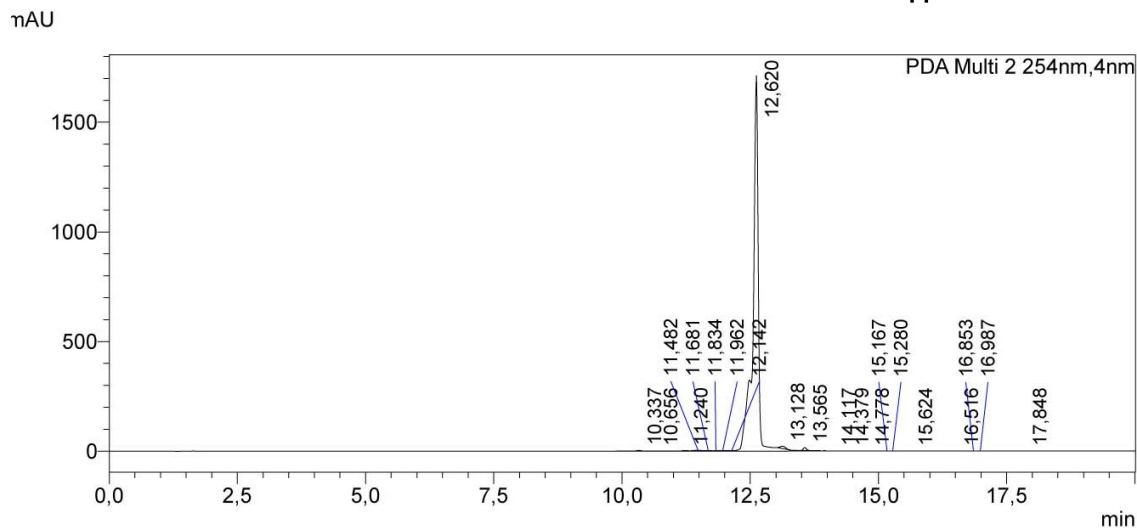

PDA Ch2 254nm

| Peak# | Ret. Time | Area     | Area%  | Height  |
|-------|-----------|----------|--------|---------|
| 1     | 10,337    | 48668    | 0,371  | 3046    |
| 2     | 10,656    | 11140    | 0,085  | 598     |
| 3     | 11,240    | 36404    | 0,278  | 1762    |
| 4     | 11,482    | 43210    | 0,329  | 3163    |
| 5     | 11,681    | 13416    | 0,102  | 1717    |
| 6     | 11,834    | 13402    | 0,102  | 1814    |
| 7     | 11,962    | 11248    | 0,086  | 1507    |
| 8     | 12,142    | 16974    | 0,129  | 2347    |
| 9     | 12,620    | 12765720 | 97,333 | 1711211 |
| 10    | 13,128    | 74065    | 0,565  | 10751   |
| 11    | 13,565    | 62125    | 0,474  | 14355   |
| 12    | 14,117    | 1314     | 0,010  | 176     |
| 13    | 14,379    | 1063     | 0,008  | 148     |
| 14    | 14,778    | 1594     | 0,012  | 216     |
| 15    | 15,167    | 2154     | 0,016  | 365     |
| 16    | 15,280    | 2384     | 0,018  | 309     |
| 17    | 15,624    | 3452     | 0,026  | 481     |
| 18    | 16,516    | 2248     | 0,017  | 237     |
| 19    | 16,853    | 1105     | 0,008  | 159     |
| 20    | 16,987    | 1747     | 0,013  | 222     |

| Peak# | Ret. Time | Area     | Area%   | Height  |
|-------|-----------|----------|---------|---------|
| 21    | 17,848    | 2028     | 0,015   | 204     |
| Total |           | 13115461 | 100,000 | 1754789 |

Figure S4. HPLC chromatogram of compound **11**.

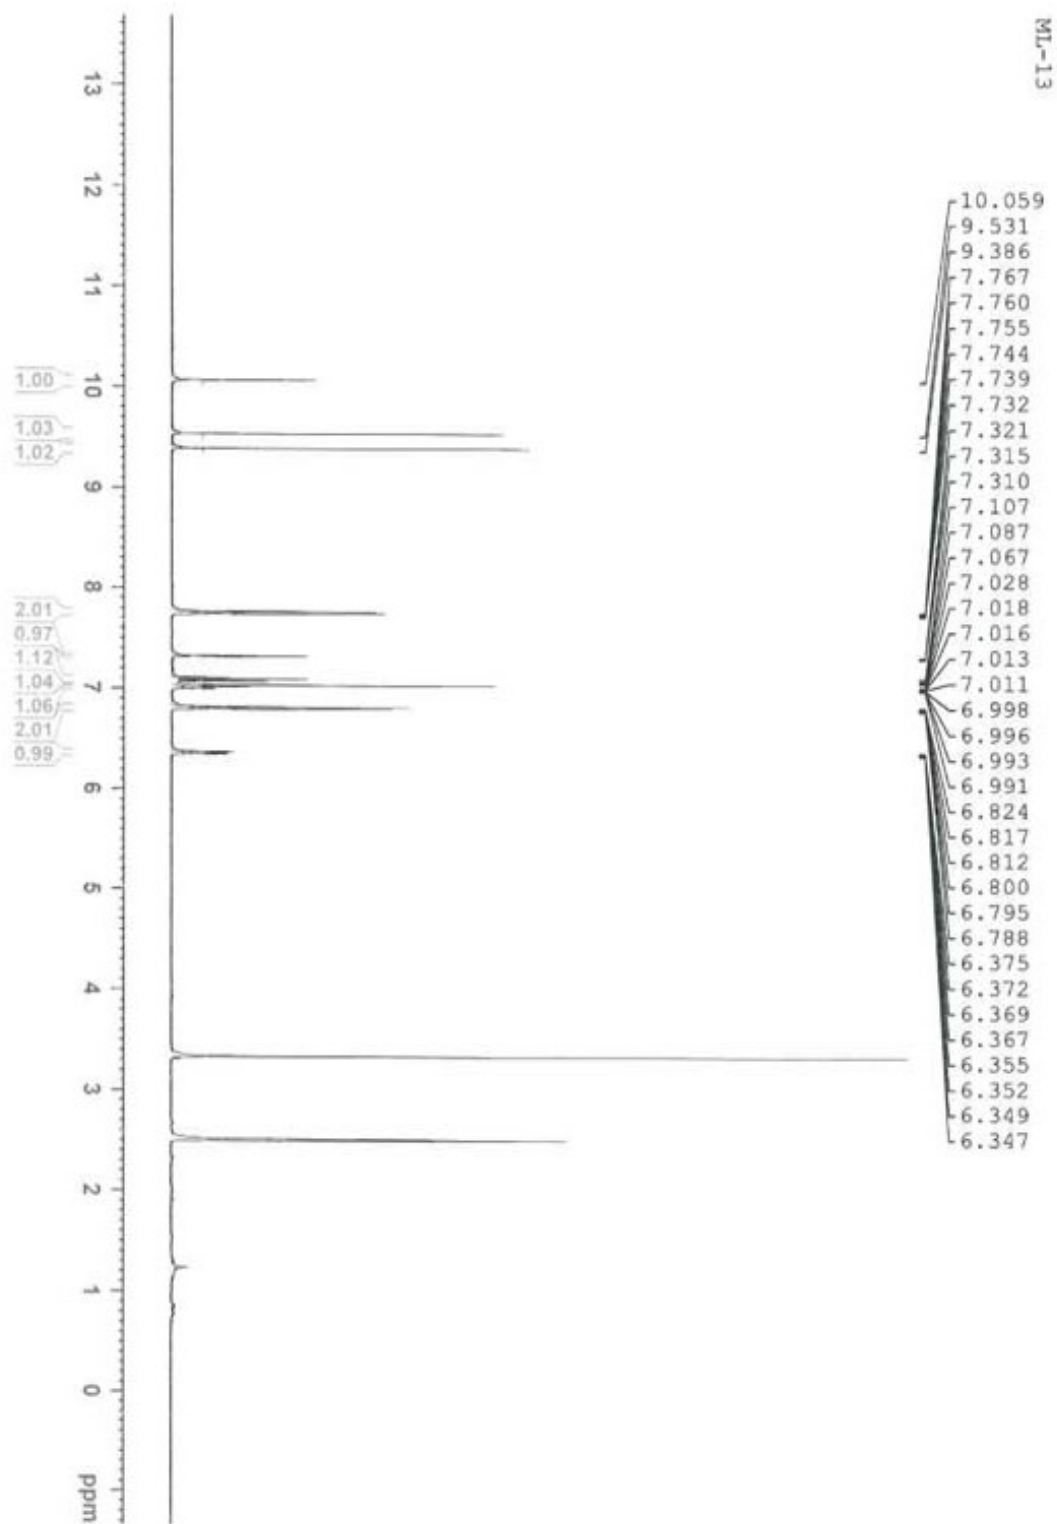

**Figure S5.**  $^1\text{H}$ -NMR of compound **8**.

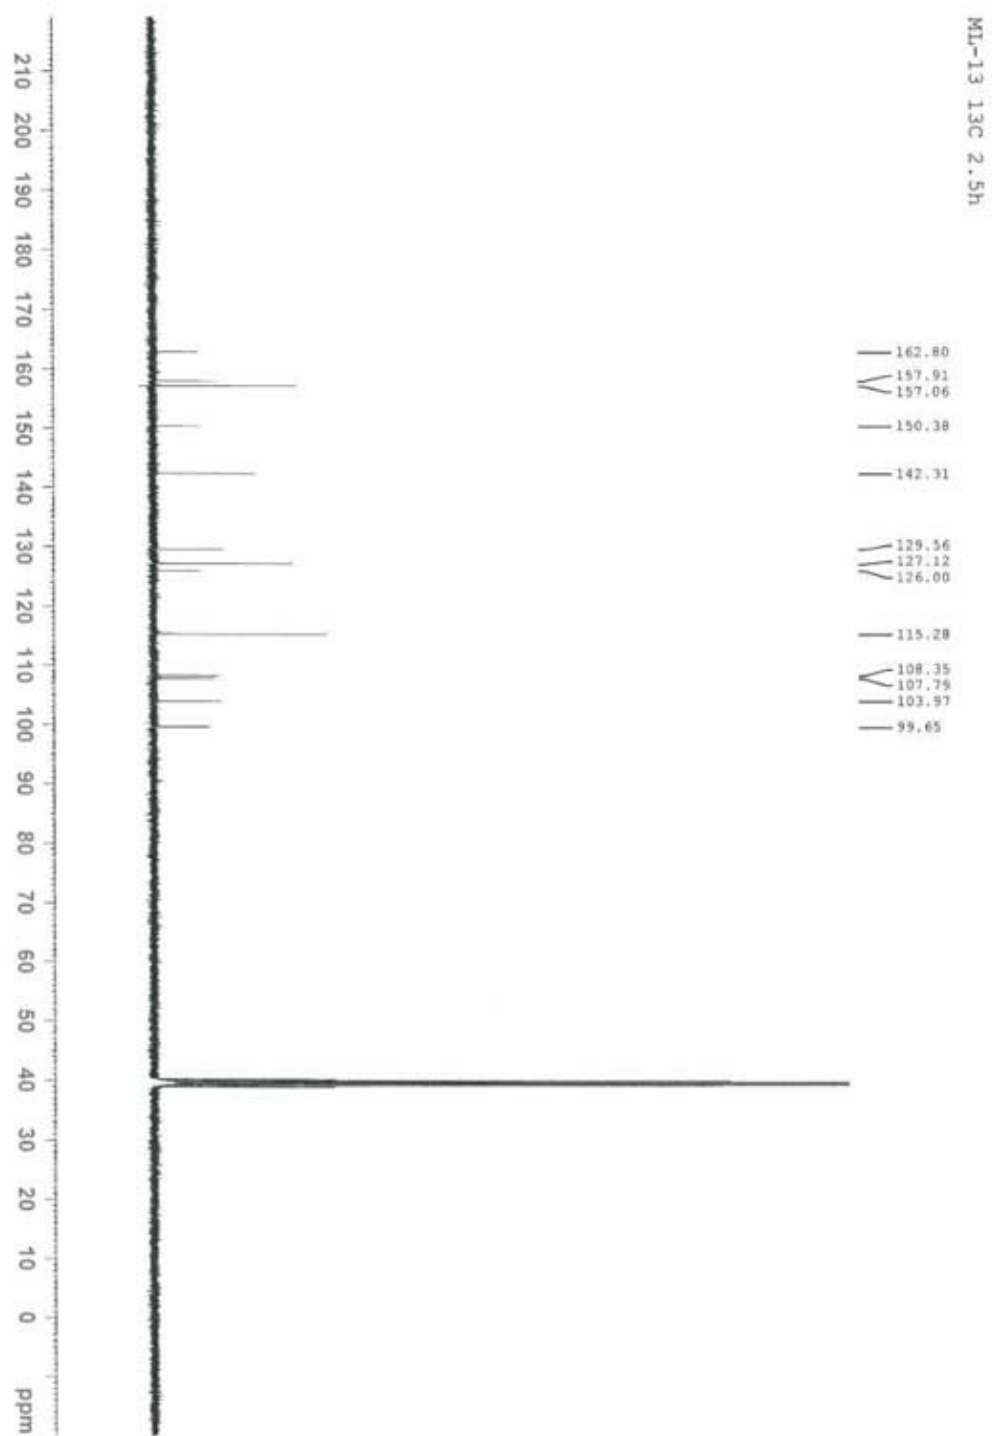

**Figure S6.**  $^{13}\text{C}$ -NMR of compound **8**.

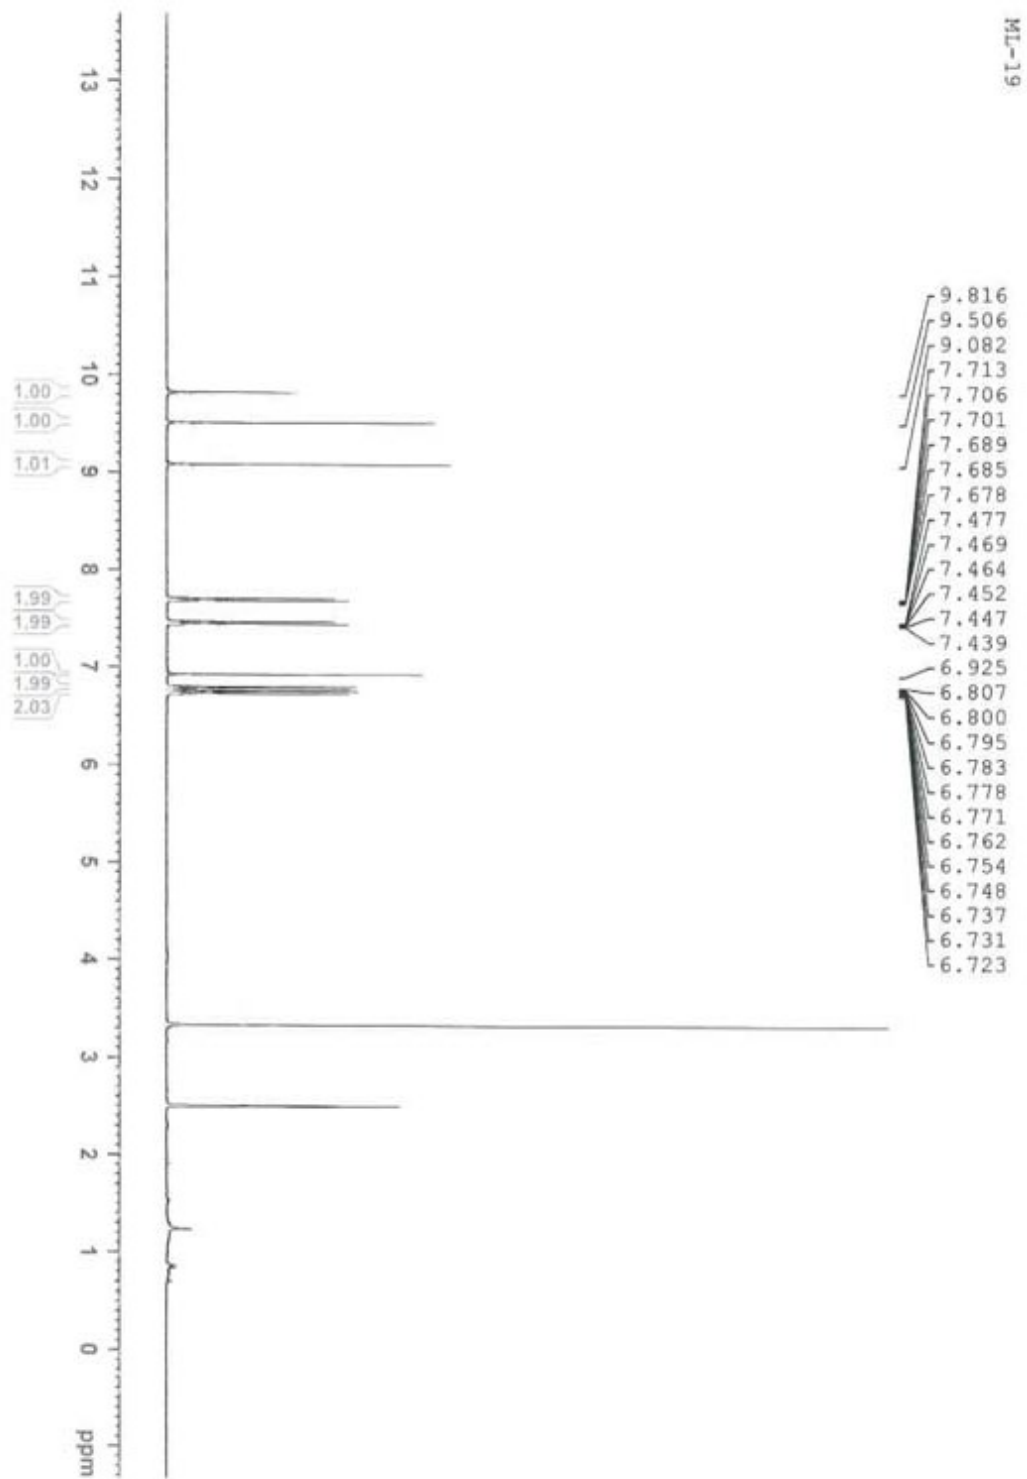

Figure S7.  $^1\text{H}$ -NMR of compound 9.



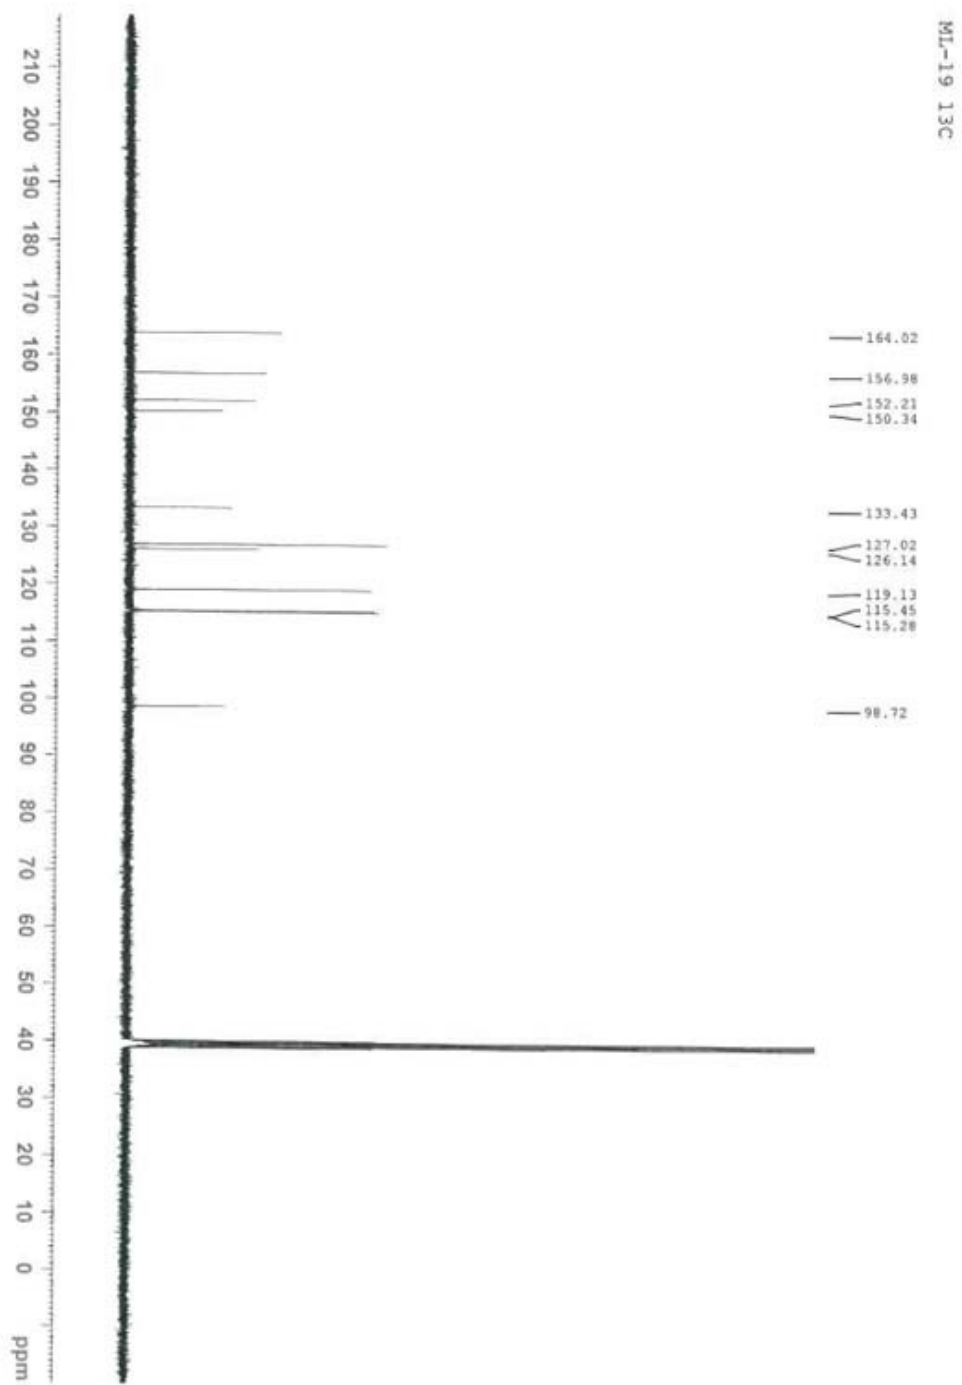

Figure S8.  $^{13}\text{C}$ -NMR of compound **9**.

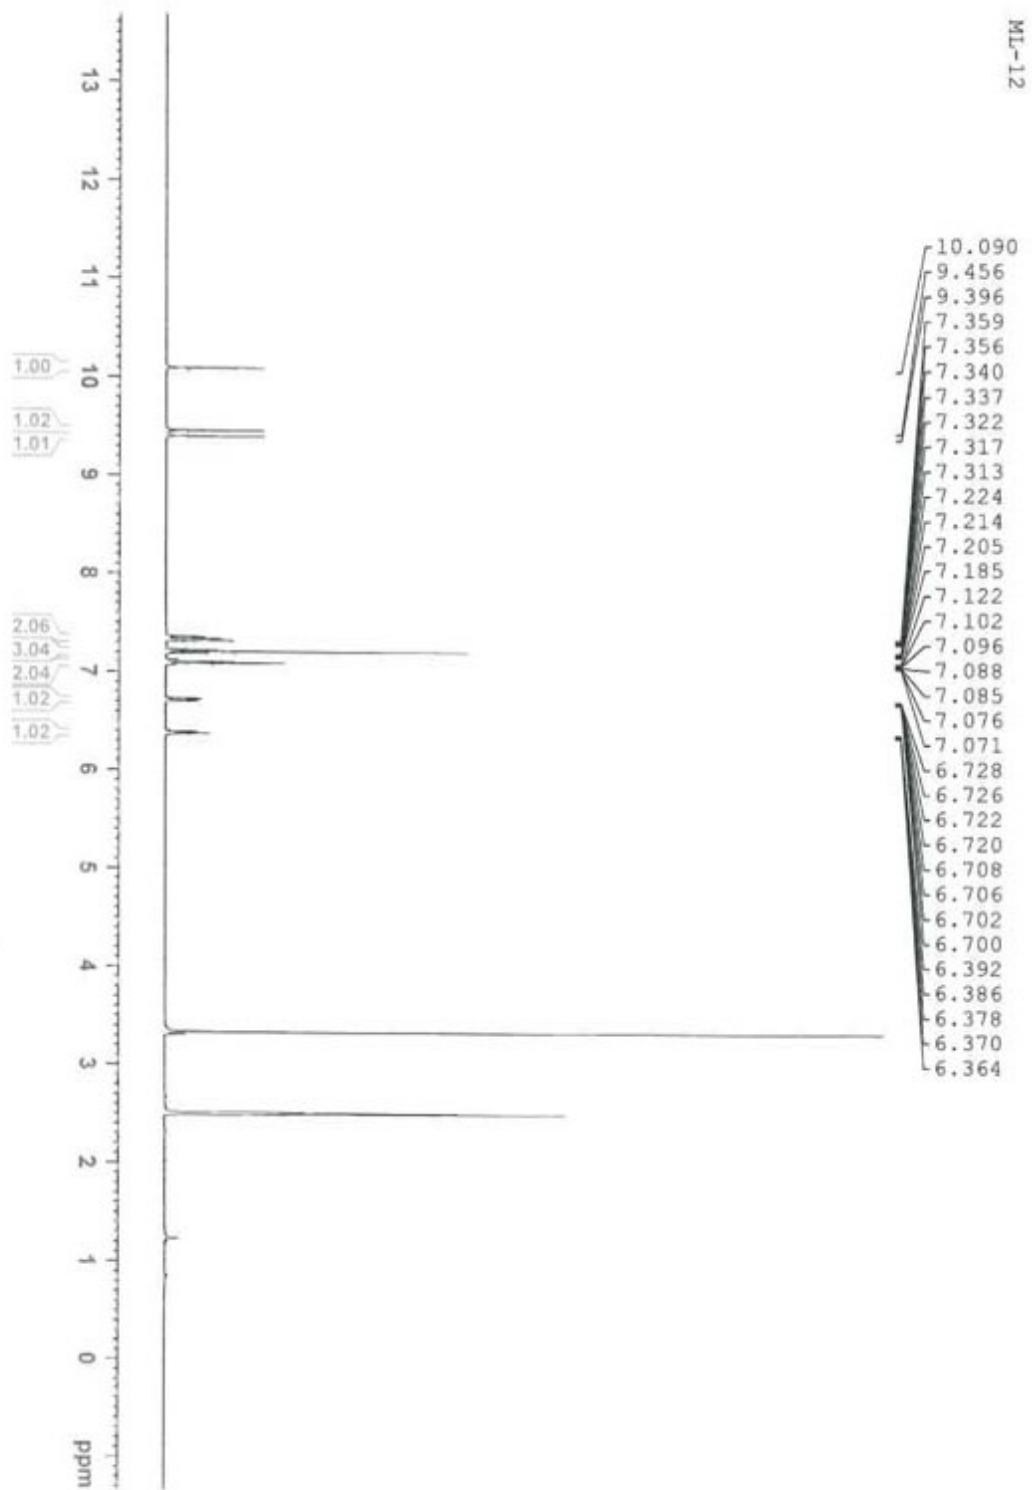

**Figure S9.**  $^1\text{H}$ -NMR of compound **10**.

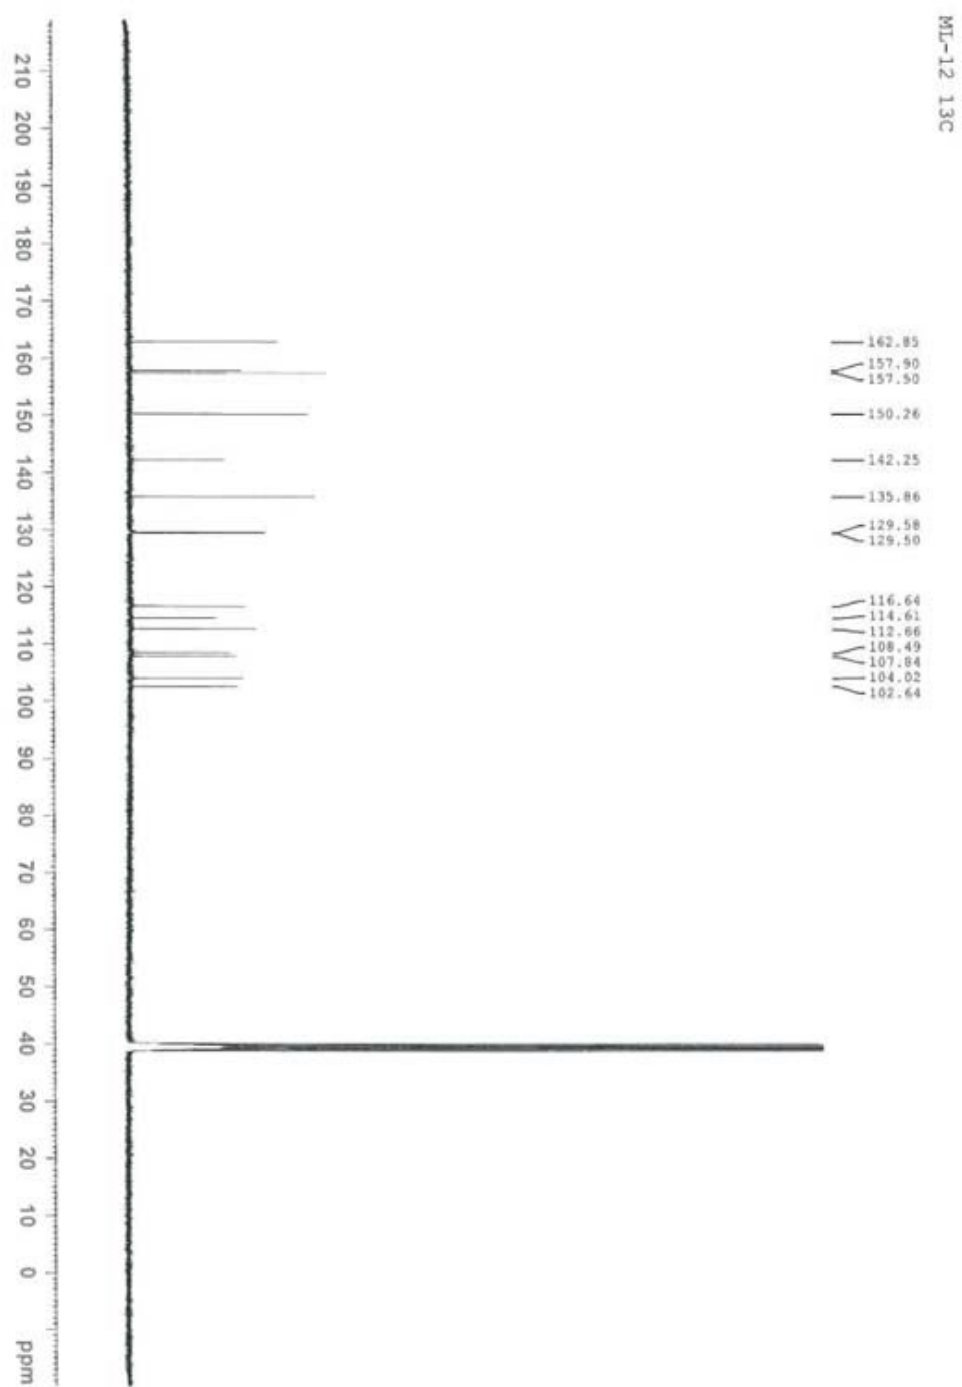

**Figure S10.**  $^{13}\text{C}$ -NMR of compound **10**.

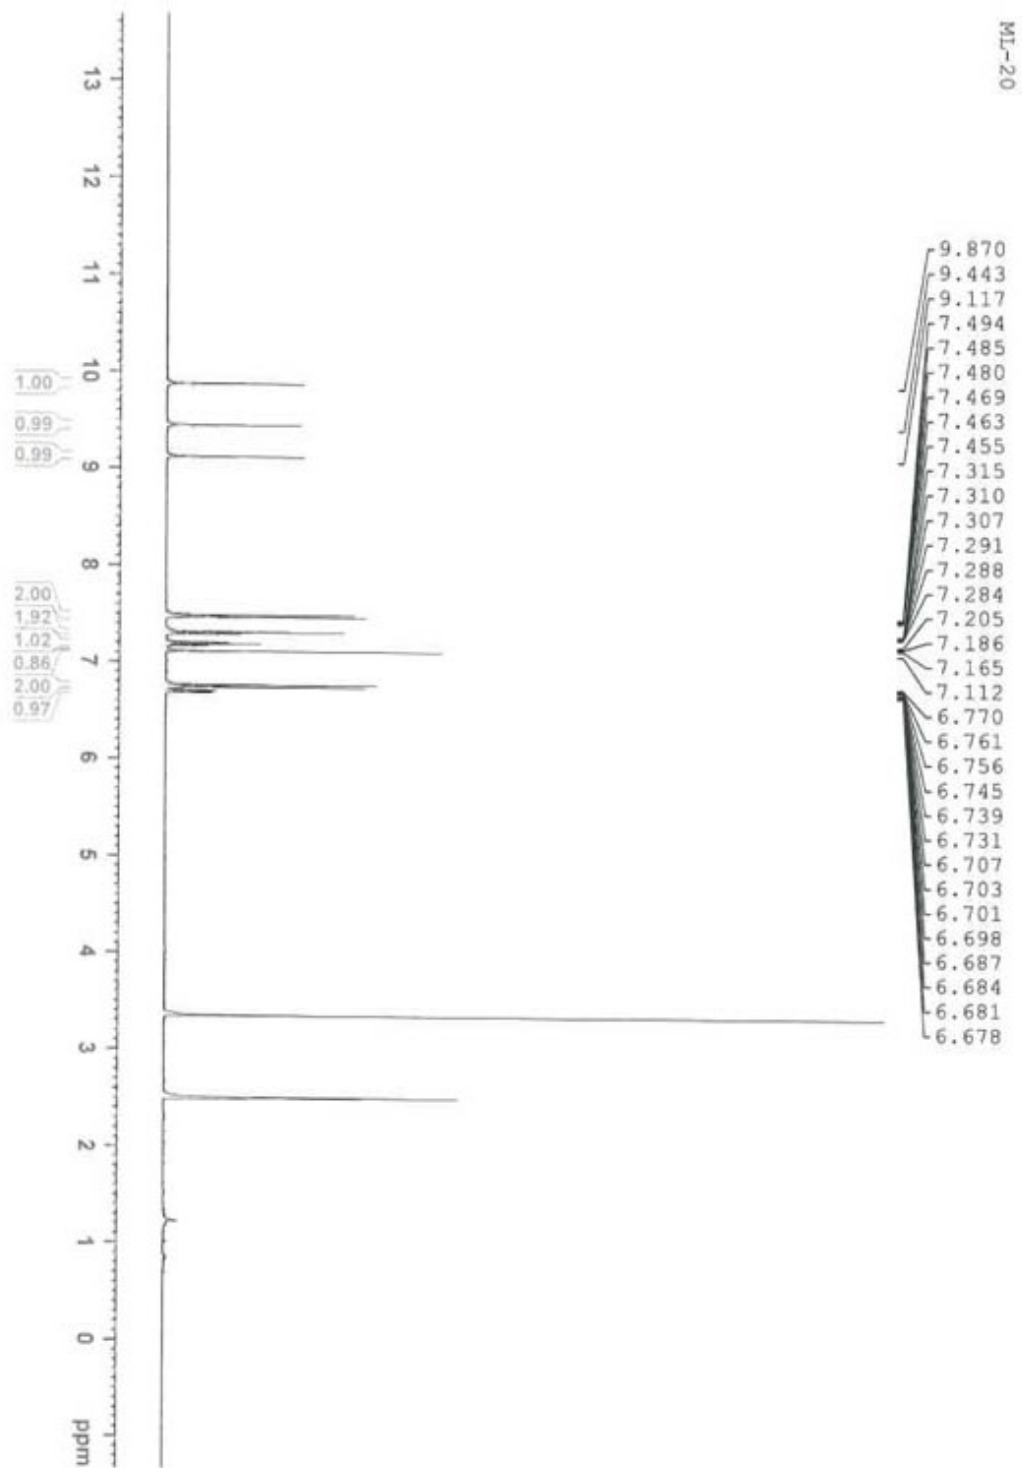

Figure S11.  $^1\text{H}$ -NMR of compound 11.

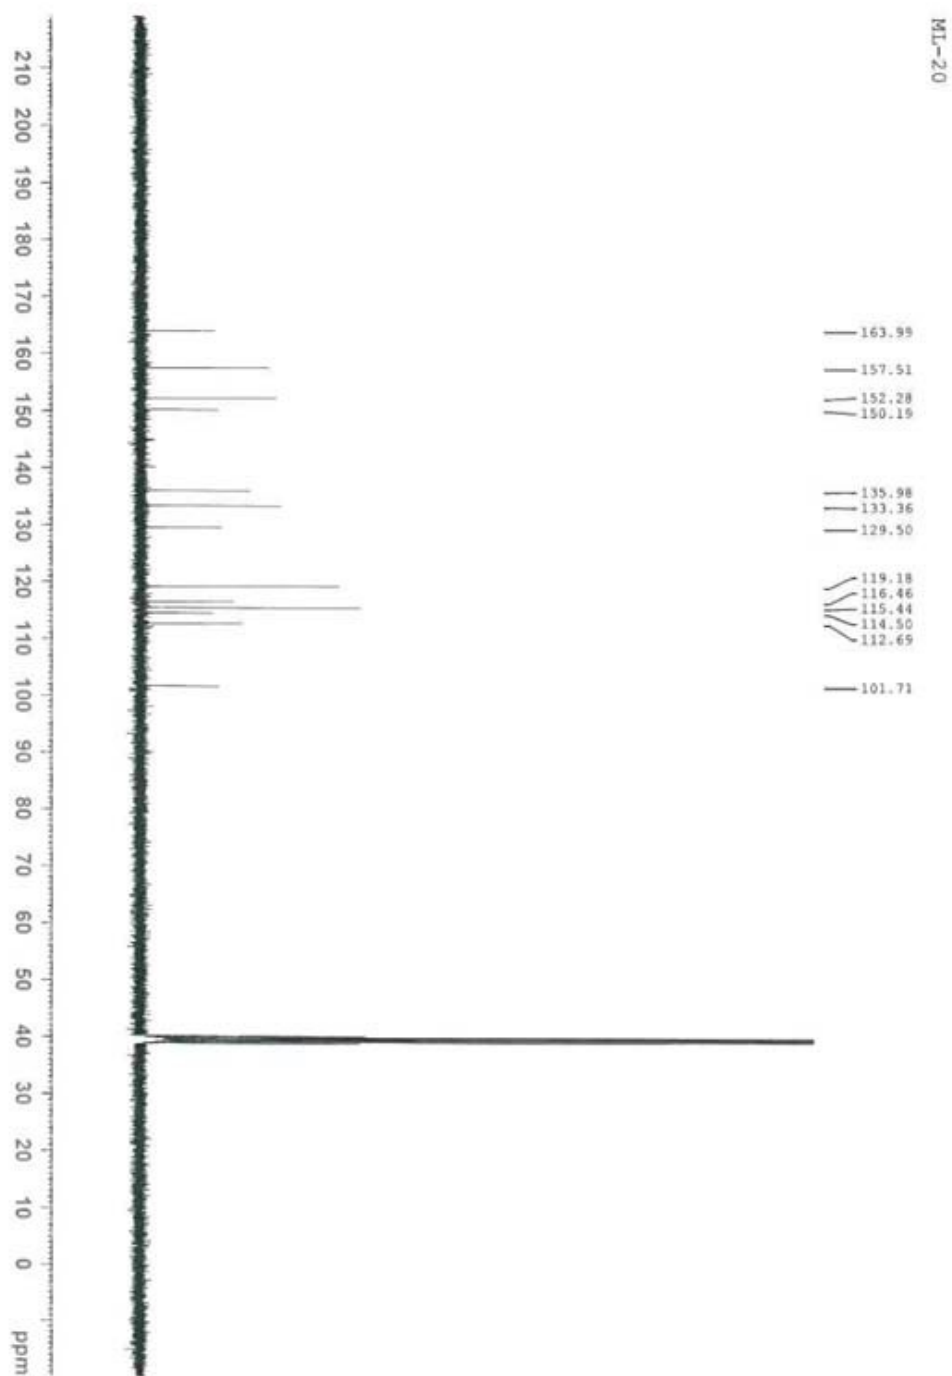

Figure S12.  $^{13}\text{C}$ -NMR of compound 11.

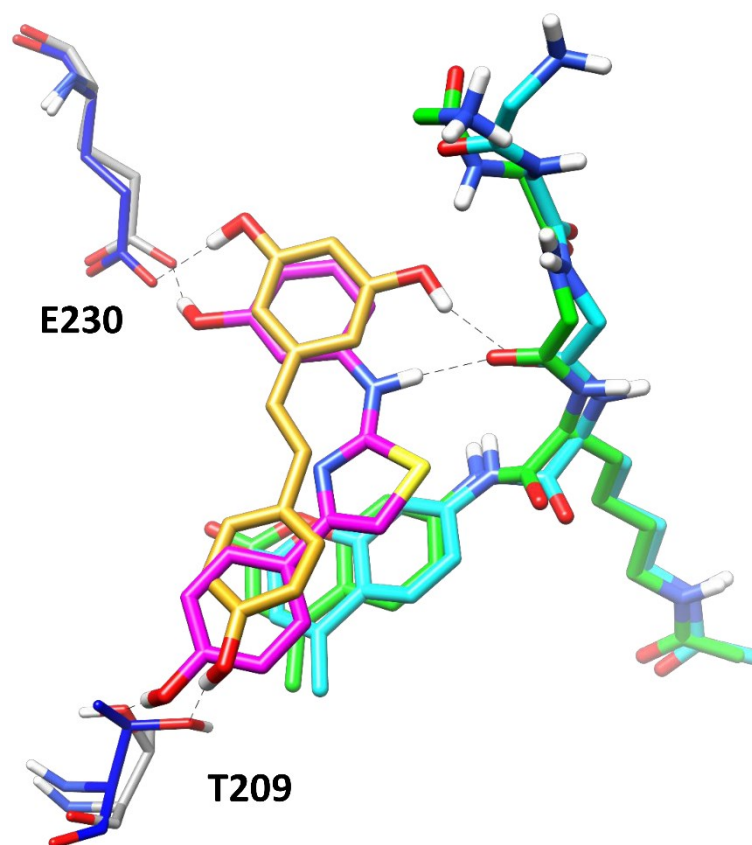

**Figure S13.** Minimized average structure of SIRT1/p53-AMC/**8** complex superimposed to the MD-refined SIRT1/p53-AMC/resveratrol complex. In the **8**-bound complex, ligand, peptide and protein residues are shown in purple, green and grey, respectively, while in the resveratrol-bound complex they are shown in gold, cyan and blue, respectively. For clarity only the ligand molecules occupying site 1 and the two protein residues (T209 and E230) forming H-bonds with them are shown. For the same reason, the side chains of R1, H2 and K3 of the p53-AMC peptide are not displayed.

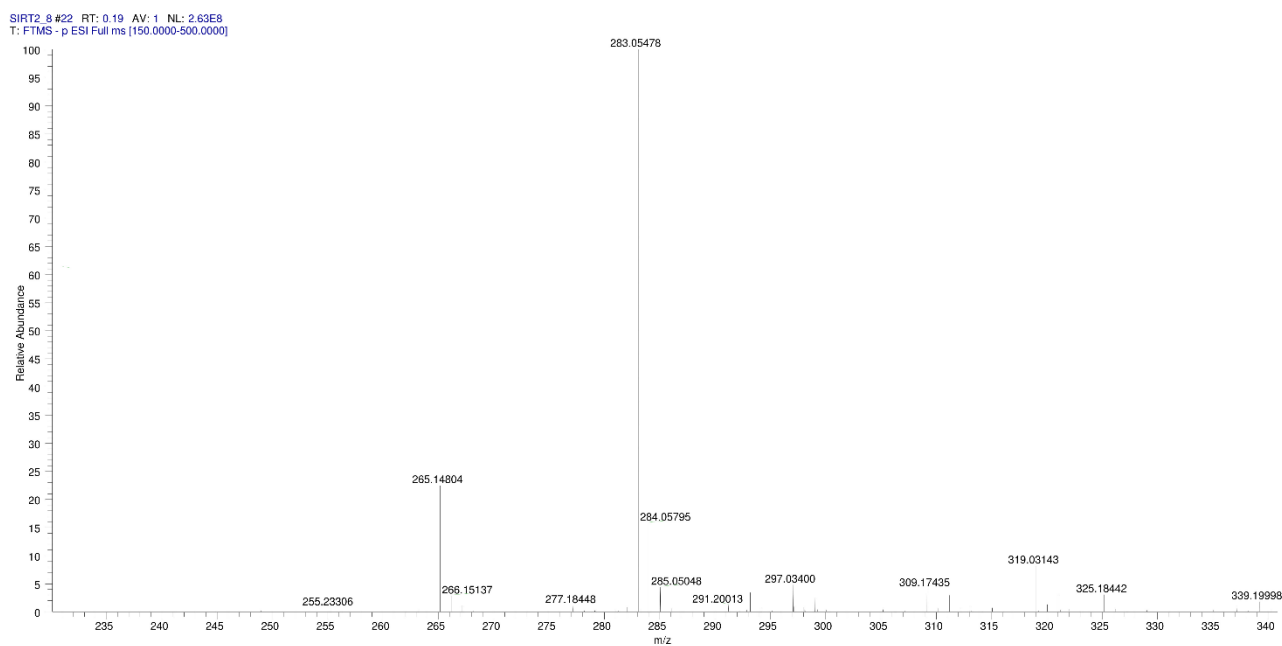

**Figure S14.** ESI-HRMS spectrum of compound **8**.

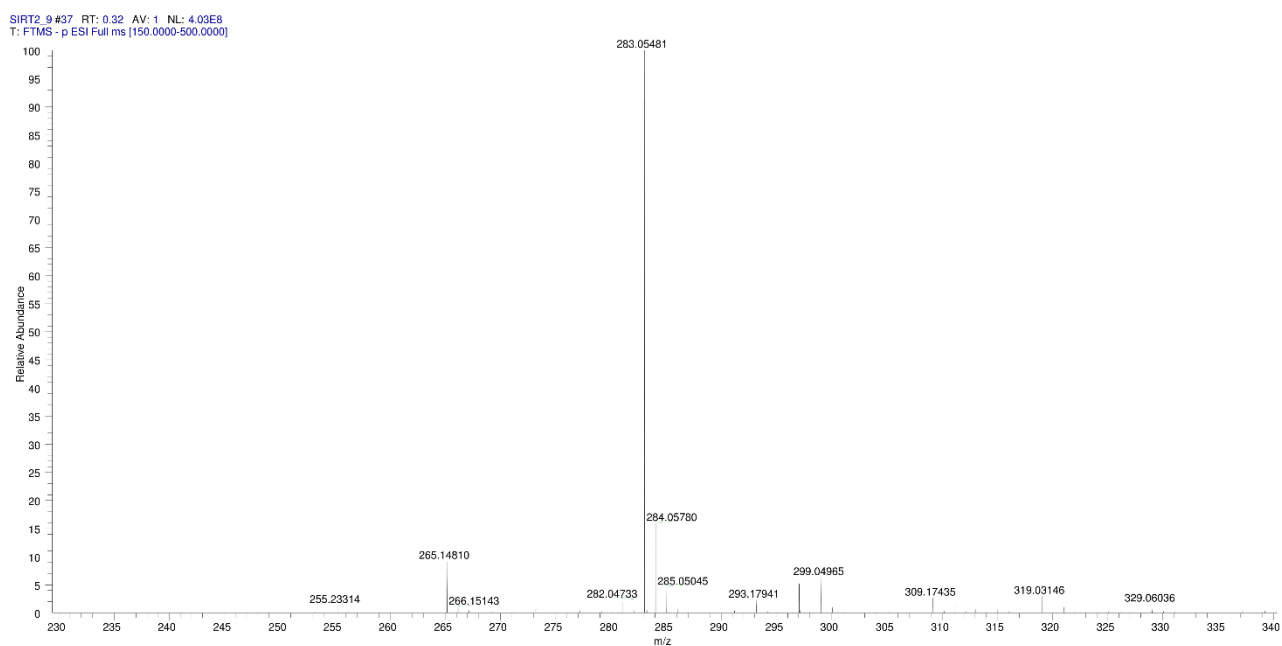

**Figure S15.** ESI-HRMS spectrum of compound **9**.

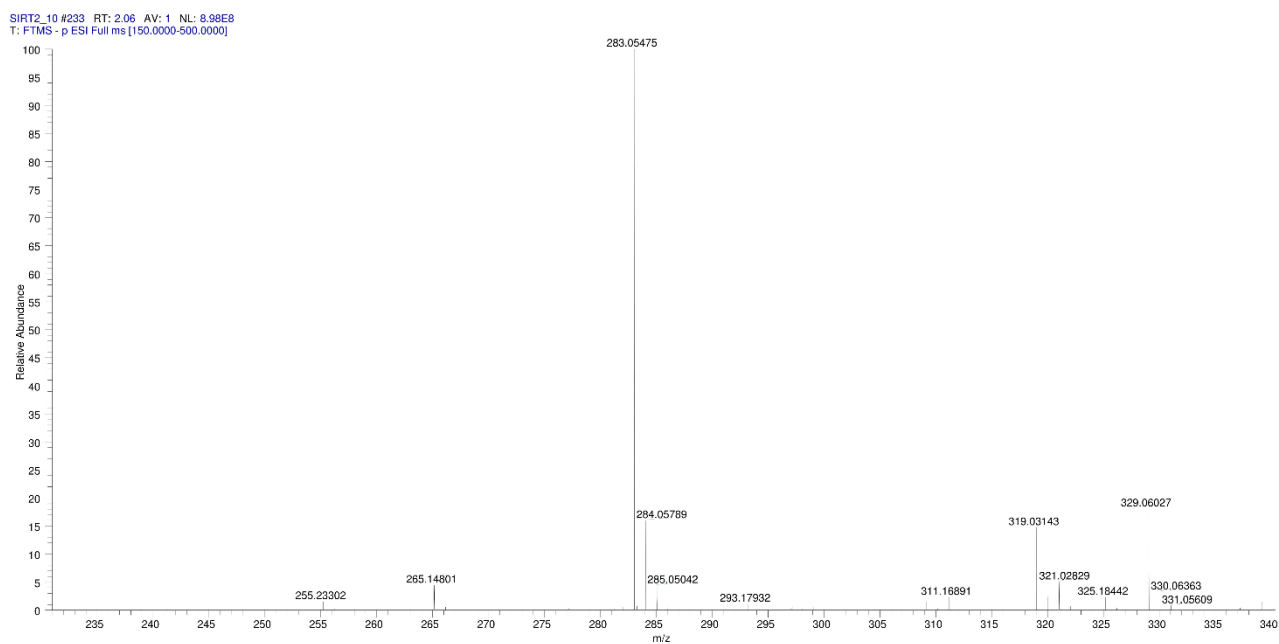

**Figure S16.** ESI-HRMS spectrum of compound **10**.

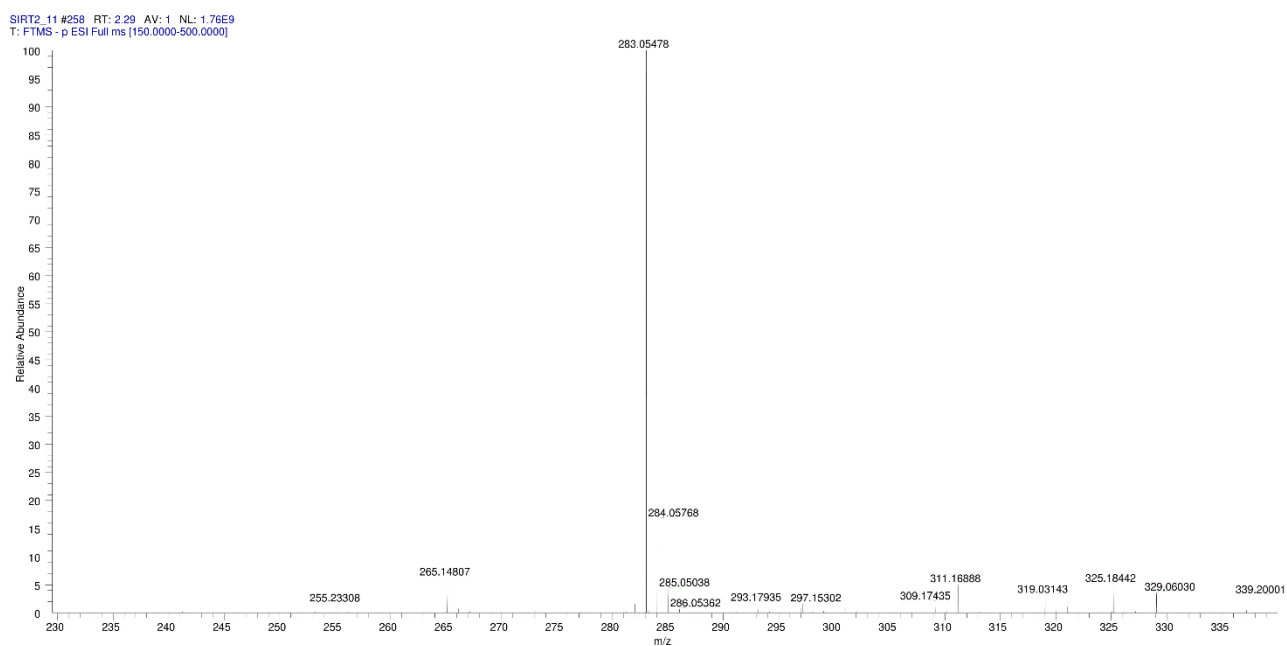

**Figure S17.** ESI-HRMS spectrum of compound **11**.
